# Supplementary material for: Development and Dynamics of Sediment Waves in a Complex Morphological and Tidal Dominant System: Southern Irish Sea
Source: MDPI journal article supplement (doi:10.3390/geosciences12120431), 2022-11-23
Supplement: s1 [file s1]

# Development and Dynamics of Sediment Waves in a Complex Morphological and Tidal Dominant System: Southern Irish Sea: Supplementary Materials

Shauna Creane <sup>1,2,3,\*</sup>, Mark Coughlan <sup>3,4,5</sup>, Michael O'Shea <sup>1,2</sup> and Jimmy Murphy <sup>1,2</sup>

<sup>1</sup> School of Civil and Environmental Engineering, University College Cork, College Road, T12 K8AF Cork, Ireland

<sup>2</sup> SFI Research Centre for Energy, Climate and Marine (MaREI), Beaufort Building, Environmental Research Institute, University College Cork, Ringaskiddy, P43 C573 Cork, Ireland

<sup>3</sup> Gavin and Doherty Geosolutions, Unit A2, Nutgrove Office Park, Rathfarnham, D14 X627 Dublin, Ireland

<sup>4</sup> School of Earth Sciences, Science Centre West, University College Dublin, Belfield, D04 N2E5 Dublin, Ireland

<sup>5</sup> SFI Research Centre for Applied Geosciences (iCrag), O'Brien Centre for Science East, University College Dublin, D04 N2E5 Dublin, Ireland

\* Correspondence: shauna.creane@ucc.ie

## 1. Supplementary Material S1: Methodology—Sediment Wave Crest Delineation and Migration Direction and Rates

### 1.1. Crest Delineation

The methodology of Di Stefano and Mayer [1] for extracting sediment wave crests by geomorphon analysis [2] was adapted by this study. The r.geomorphon tool used in this method was originally developed for the terrestrial environment [2] but has since proven to be highly proficient at seabed characterisation [1]. This tool identifies the 10 most frequent landforms based on elevation differences between the central cell and its eight surrounding cells. These landforms consist of flat, summit, ridge, shoulder, spur, slope, hollow, footslope, valley and depression. The r.geomorphon tool was applied to each bathymetry dataset at each site. Runtime parameters were varied depending on the condition of each dataset. The resulting raster was reclassified to extract the classified 'summit' and 'ridge' (classifications 2 and 3 respectively) pixels as sediment wave crests. The resulting raster was thinned, filtered by length, and vectorised. Topological cleaning was carried out to remove any unwanted dangles and the sediment wave crests were smoothed to aid the next process of migration rate calculation, whilst ensuring the accuracy of the crest delineations were retained. Georeferenced polyline shapefiles were produced. These datasets were quality controlled (QC) in ArcGIS v.10.8 using slope and Terrain Ruggedness (VRM) tool in the Benthic Terrain Modeller.

### 1.2. Sand Wave Migration Calculation

The QGIS 'Points along the line' tool was applied to QC shapefiles to generate 10m spaced points along each crest, whereby the angle of the crest line at each point is calculated and presented in the point shapefile attribute table. All polyline and point shapefiles were taken into ArcGIS v10.8 where migration rate was calculated.

Taking two time-lapse datasets at a time and starting with the earlier time-stamp, several steps were taken to calculate migration rate and direction. Depending on the migration direction of the sediment wave (determined using the 'minus' tool or generating a Difference of DTM (DOD) whereby displacement direction of the wave crest is clearly identified) the angle from the crest to a perpendicular line was calculated in the point shapefile by either adding or subtracting 90° from the line angle at that point. The 'bearing distance to line' tool was used to generate a perpendicular line from each point on the crest using this newly calculated bearing angle, the x and y coordinate of each point, and

**Citation:** Creane, S.; Coughlan, M.; O'Shea, M.; Murphy, J. Development and Dynamics of Sediment Waves in a Complex Morphological and Tidal Dominant System: Southern Irish Sea. *Geosciences* **2022**, *12*, 431. <https://doi.org/10.3390/geosciences12120431>

Academic Editors: Katrien Van Landeghem and Jesus Martinez-Frias

Received: 5 October 2022

Accepted: 17 November 2022

Published: 23 November 2022

**Publisher's Note:** MDPI stays neutral with regard to jurisdictional claims in published maps and institutional affiliations.

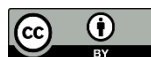

**Copyright:** © 2022 by the authors. Licensee MDPI, Basel, Switzerland. This article is an open access article distributed under the terms and conditions of the Creative Commons Attribution (CC BY) license (<https://creativecommons.org/licenses/by/4.0/>).

an estimated fixed maximum extended distance. These lines were intersected with the crest of the next time-lapse dataset to generate a corresponding second point shapefile. Each corresponding a and b points were connected via a polyline shapefile whereby the length of each line corresponds to the perpendicular horizontal displacement of the sediment wave crest from one time-stamp to another. Annual migration rates are subsequently calculated based on the dates of each survey.

Crest perpendicular cross-sections over time-lapse data were extracted using various ArcGIS tools (Stack Profile) for further morphological and geomorphological analysis. This study uses a combination of the two-part geomorphological classification scheme developed by Dove et al [3] and the classification scheme adopted by Van Landeghem et al [4]. Digital Elevation Models (DEM) of difference (DOD) were calculated to quantify the volumetric change between successive bathymetric surveys and reveal geomorphic changes in a 3-dimensional (3D) surface. This aided the quantification of change in a 1-D, 2D and 3D manner allowing for a better understanding of bedform development on a regional scale and allow interpretation of trends in the wider hydrodynamic-morphodynamic system.

## 2. Supplementary Material S2: Results—Statistical Correlation between Sediment Wave Dimensions and Individual Environmental Parameters

The Pearson correlation coefficient is used to describe the strength of a relationship between independent variables and dependent variables. The interpretation of the strength of the correlation described by Evans [5] is adopted by this study (**Error! Reference source not found.**). **Error! Reference source not found.** to **Error! Reference source not found.** display the resultant relationships between sediment wave dimensions in the south-western Irish Sea and environmental parameters highlighted in section 4.3.1 of the main research paper, “Development and dynamics of sediment waves in a complex morphological and tidal dominant system: southern Irish Sea”.

**Table S1.** Interpretation of Pearson correlation coefficient (r).

| Correlation coefficient (r) | Strength                          |
|-----------------------------|-----------------------------------|
| + 1.00                      | Perfect positive                  |
| + 0.8 to 1.0                | Very strong positive              |
| + 0.6 to 0.8                | Strong positive                   |
| + 0.4 to 0.6                | Moderate positive                 |
| + 0.2 to 0.4                | Weak positive                     |
| 0.0 to + 0.2                | Very weak positive/no association |
| 0.0 to - 0.2                | Very weak negative/no association |
| - 0.2 to - 0.4              | Weak negative                     |
| - 0.4 to - 0.6              | Moderate negative                 |
| - 0.6 to - 0.8              | Strong negative                   |
| - 0.8 to - 1.0              | Very strong negative              |
| - 1.0                       | Perfect negative                  |

**Table S2.** Relationship between sediment wave heights ( $H$ ) and wavelengths ( $L$ ) in the south-western Irish Sea. The Full dataset has been broken into three environments i.e. Southern Banks, Northern Banks and Independent Assemblages, and each individual study site.

| Dataset           | Power regression equation | $r^2$ | Correlation coefficient (r) | Correlation description |
|-------------------|---------------------------|-------|-----------------------------|-------------------------|
| Full dataset      | $H_{mean} = 0.03L^{0.90}$ | 0.33  | 0.58                        | Moderate positive       |
| Southern Banks    | $H_{mean} = 0.05L^{0.77}$ | 0.27  | 0.52                        | Moderate positive       |
| Northern Banks    | $H_{mean} = 0.02L^{0.95}$ | 0.28  | 0.52                        | Moderate positive       |
| Independent Banks | $H_{mean} = 0.03L^{0.96}$ | 0.50  | 0.71                        | Strong positive         |
| 8                 | $H_{mean} = 0.03L^{0.91}$ | 0.53  | 0.73                        | Strong positive         |

|         |                           |      |      |                                   |
|---------|---------------------------|------|------|-----------------------------------|
| 2F      | $H_{mean} = 0.08L^{0.56}$ | 0.15 | 0.39 | Weak positive                     |
| 3C      | $H_{mean} = 0.12L^{0.52}$ | 0.12 | 0.34 | Weak positive                     |
| 6       | $H_{mean} = 0.04L^{0.92}$ | 0.48 | 0.69 | Strong positive                   |
| 5       | $H_{mean} = 0.06L^{0.83}$ | 0.38 | 0.62 | Strong positive                   |
| 4       | $H_{mean} = 0.29L^{0.13}$ | 0    | 0.07 | Very weak positive/no association |
| 1B      | $H_{mean} = 0.08L^{0.78}$ | 0.30 | 0.55 | Moderate positive                 |
| 1C      | $H_{mean} = 0.10L^{0.63}$ | 0.14 | 0.38 | Weak positive                     |
| 1A      | $H_{mean} = 0.01L^{1.04}$ | 0.30 | 0.55 | Moderate positive                 |
| 3A & 3B | $H_{mean} = 0.06L^{0.64}$ | 0.13 | 0.36 | Weak positive                     |
| 2E      | $H_{mean} = 0.11L^{0.63}$ | 0.31 | 0.56 | Moderate positive                 |
| 2D      | $H_{mean} = 0.22L^{0.55}$ | 0.19 | 0.43 | Moderate positive                 |
| 2B & 2C | $H_{mean} = 0.11L^{0.71}$ | 0.31 | 0.56 | Moderate positive                 |
| 2A      | $H_{mean} = 0.07L^{0.69}$ | 0.26 | 0.51 | Moderate positive                 |
| 7       | $H_{mean} = 0.08L^{0.67}$ | 0.19 | 0.43 | Moderate positive                 |

**Table S3.** Relationship between sediment wave heights ( $H$ ), wavelengths ( $L$ ), and Sand Wave Index (SWI) with Rouse Number ( $P$ ) in the south-western Irish Sea.

| Dataset                    | Power Regression Equation | $r^2$                  | Correlation coefficient ( $r$ ) | Correlation description            |
|----------------------------|---------------------------|------------------------|---------------------------------|------------------------------------|
| Full                       | $SWI = 51.02P^{0.036}$    | 0.0019                 | 0.043474                        | Very weak positive/no association  |
| Independent sediment waves | $SWI = 44.57P^{-0.051}$   | 0.0063                 | 0.079429                        | Very weak negative/no association  |
| Northern Banks             | $SWI = 47.91P^{0.078}$    | 0.0073                 | 0.085545                        | Very weak positive/no association  |
| Southern Banks             | $SWI = 69.89P^{-0.072}$   | 0.0049                 | 0.06976                         | Very weak negative/no association  |
| Full                       | $L = 132.14P^{0.035}$     | 0.0028                 | 0.05332                         | Very weak positive/no association  |
| Independent sediment waves | $L = 167.48P^{-0.013}$    | 0.0004                 | 0.0191                          | Very weak negative/no association  |
| Northern Banks             | $L = 117.59P^{0.072}$     | 0.01474                | 0.1214                          | Very weak positive/no association  |
| Southern Banks             | $L = 121.67P^{0.061}$     | 0.0057                 | 0.0757                          | Very weak positive/no association  |
| Full                       | $H = 2.59P^{-0.001}$      | $-4.62 \times 10^{-6}$ | N/A                             | no association                     |
| Independent sediment waves | $H = 3.76P^{0.038}$       | 0.0017                 | 0.0413                          | Very weak positive /no association |
| Northern Banks             | $H = 2.45P^{-0.006}$      | $2.74 \times 10^{-6}$  | 0.001654                        | Very weak negative/no association  |
| Southern Banks             | $H = 1.74P^{0.132}$       | 0.01254                | 0.111982                        | Very weak positive/no association  |

**Table S4.** Relationship between sediment wave heights ( $H$ ), wavelengths ( $L$ ), and Sand Wave Index (SWI) with Water depth ( $D$ ) in the south-western Irish Sea.

| Dataset                    | Power Regression Equation | $r^2$  | Correlation coefficient ( $r$ ) | Correlation description       |
|----------------------------|---------------------------|--------|---------------------------------|-------------------------------|
| Full                       | $SWI = 382.32D^{-0.56}$   | 0.177  | 0.421                           | Moderate negative association |
| Independent sediment waves | $SWI = 539D^{-0.64}$      | 0.051  | 0.226                           | Weak negative association     |
| Northern Banks             | $SWI = 895.24D^{-0.83}$   | 0.1664 | 0.408                           | Moderate negative association |
| Southern Banks             | $SWI = 639.79D^{-0.75}$   | 0.1503 | 0.388                           | Moderate negative association |
| Full                       | $L = 88.83D^{0.134}$      | 0.0157 | 0.125                           | Very weak/no association      |
| Independent sediment waves | $L = 69.77D^{0.21}$       | 0.0052 | 0.072                           | Very weak/no association      |
| Northern Banks             | $L = 69.62D^{0.178}$      | 0.018  | 0.134                           | Very weak/no association      |

|                            |                                   |         |        |                               |
|----------------------------|-----------------------------------|---------|--------|-------------------------------|
| Southern Banks             | $L = 153.05D^{-0.035}$            | 0.00054 | 0.0232 | Very weak/no association      |
| Full                       | $H = 0.232D^{0.71}$               | 0.1813  | 0.426  | Moderate positive association |
| Independent sediment waves | $H = 0.129D^{0.85}$               | 0.045   | 0.213  | Weak positive association     |
| Northern Banks             | $H = 0.078D^{1.01}$               | 0.1781  | 0.422  | Moderate positive association |
| Southern Banks             | $H = 0.239D^{0.711}$              | 0.1032  | 0.321  | Weak positive association     |
| 7                          | $H_{mean} = 0D^{2.593}$           | 0.014   | 0.119  | Very weak/no association      |
| 2A                         | $H_{mean} = 2.82D^{-0.092}$       | 0       | 0.018  | Very weak/no association      |
| 2B & 2C                    | $H_{mean} = 0.315D^{0.747}$       | 0.108   | 0.328  | Weak positive association     |
| 2D                         | $H_{mean} = 0.441D^{0.699}$       | 0.110   | 0.332  | Weak positive association     |
| 2E                         | $H_{mean} = 1.971D^{0.075}$       | 0.001   | 0.032  | Very weak/no association      |
| 3A & 3B                    | $H_{mean} = 0.071D^{0.965}$       | 0.137   | 0.370  | Weak positive association     |
| 1A                         | $H_{mean} = 0.311D^{0.565}$       | 0.034   | 0.185  | Very weak/no association      |
| 1C                         | $H_{mean} = 0.044D^{1.178}$       | 0.287   | 0.535  | Moderate positive association |
| 1B                         | $H_{mean} = 1.919D^{0.204}$       | 0.006   | 0.077  | Very weak/no association      |
| 4                          | $H_{mean} = 0.001D^{1.874}$       | 0.003   | 0.057  | Very weak/no association      |
| 5                          | $H_{mean} = 0.014D^{1.454}$       | 0.031   | 0.176  | Very weak/no association      |
| 6                          | $H_{mean} = 0D^{2.156}$           | 0.051   | 0.227  | Weak positive association     |
| 3C                         | $H_{mean} = 0.950D^{0.085}$       | 0.001   | 0.227  | Weak positive association     |
| 2F                         | $H_{mean} = 0.024D^{1.672}$       | 0.084   | 0.290  | Weak positive association     |
| 8                          | $H_{mean} = 221949.933D^{-2.853}$ | 0.203   | 0.451  | Moderate positive association |

**Table S5.** Relationship between sediment wave heights ( $H$ ), wavelengths ( $L$ ), and Sand Wave Index (SWI) with median grain size ( $D_{50}$ ) in the south-western Irish Sea.

| Dataset                    | Power Regression Equation    | $r^2$                  | Correlation coefficient ( $r$ ) | Correlation description           |
|----------------------------|------------------------------|------------------------|---------------------------------|-----------------------------------|
| Full dataset               | $SWI = 55.41D_{50}^{0.041}$  | 0.0021                 | 0.046                           | Very weak positive/no association |
| Independent sediment waves | $SWI = 39.93D_{50}^{-0.056}$ | 0.0051                 | 0.072                           | Very weak negative/no association |
| Northern Banks             | $SWI = 57.82D_{50}^{0.094}$  | 0.011                  | 0.104                           | Very weak positive/no association |
| Southern Banks             | $SWI = 59.91D_{50}^{-0.045}$ | 0.00172                | 0.0415                          | Very weak negative/no association |
| Full dataset               | $L = 142.82D_{50}^{0.037}$   | 0.0273                 | 0.0523                          | Very weak positive/no association |
| Independent sediment waves | $L = 158.23D_{50}^{-0.061}$  | 0.006                  | 0.0755                          | Very weak negative/no association |
| Northern Banks             | $L = 137.71D_{50}^{0.072}$   | 0.072                  | 0.015                           | Very weak positive/no association |
| Southern Banks             | $L = 139.25D_{50}^{0.053}$   | 0.004                  | 0.064                           | Very weak positive/no association |
| Full dataset               | $H = 2.58D_{50}^{-0.0043}$   | $8.77 \times 10^{-6}$  | 0.002962                        | Very weak negative/no association |
| Independent sediment waves | $H = 3.96D_{50}^{-0.0057}$   | $-4.61 \times 10^{-6}$ | N/A                             | no association                    |
| Northern Banks             | $H = 2.38D_{50}^{-0.022}$    | 0.00041                | 0.02                            | Very weak negative/no association |
| Southern Banks             | $H = 2.32D_{50}^{0.098}$     | 0.0063                 | 0.079                           | Very weak negative/no association |

**Table S6.** Relationship between sediment wave heights ( $H$ ), wavelengths ( $L$ ), and Sand Wave Index (SWI) with maximum current speed ( $U_{cmax}$ ) in the south-western Irish Sea.

| Dataset                    | Power Regression Equation     | $r^2$  | Correlation coefficient ( $r$ ) | Correlation description           |
|----------------------------|-------------------------------|--------|---------------------------------|-----------------------------------|
| Full dataset               | $SWI = 56.39U_{cmax}^{-0.23}$ | 0.005  | 0.0729                          | Very weak negative/no association |
| Independent sediment waves | $SWI = 40.1U_{cmax}^{0.09}$   | 0.0017 | 0.0418                          | Very weak positive/no association |

|                            |                                 |         |        |                                   |
|----------------------------|---------------------------------|---------|--------|-----------------------------------|
| Northern Banks             | $SWI = 48.19U_{c_{max}}^{0.51}$ | 0.0063  | 0.079  | Very weak positive/no association |
| Southern Banks             | $SWI = 59.9U_{c_{max}}^{0.12}$  | 0.0011  | 0.033  | Very weak positive/no association |
| Full dataset               | $L = 139.26U_{c_{max}}^{0.033}$ | 0.00018 | 0.0134 | Very weak negative/no association |
| Independent sediment waves | $L = 182.83U_{c_{max}}^{-0.32}$ | 0.0213  | 0.146  | Very weak negative/no association |
| Northern Banks             | $L = 119.65U_{c_{max}}^{0.40}$  | 0.009   | 0.095  | Very weak negative/no association |
| Southern Banks             | $L = 138.86U_{c_{max}}^{-0.12}$ | 0.0018  | 0.042  | Very weak negative/no association |
| Full dataset               | $H = 2.47U_{c_{max}}^{0.26}$    | 0.0047  | 0.069  | Very weak positive/no association |
| Independent sediment waves | $H = 4.56U_{c_{max}}^{-0.403}$  | 0.0188  | 0.137  | Very weak negative/no association |
| Northern Banks             | $H = 2.48U_{c_{max}}^{-0.1121}$ | 0.00019 | 0.0139 | Very weak negative/no association |
| Southern Banks             | $H = 2.32U_{c_{max}}^{-0.2327}$ | 0.00331 | 0.058  | Very weak negative/no association |

**Table S7.** Relationship between sediment wave heights ( $H$ ), wavelengths ( $L$ ), and Sand Wave Index (SWI) with residual current speed ( $U_{c_{res}}$ ) in the south-western Irish Sea.

| Dataset                    | Power Regression Equation        | $r^2$  | Correlation coefficient ( $r$ ) | Correlation description           |
|----------------------------|----------------------------------|--------|---------------------------------|-----------------------------------|
| Full dataset               | $SWI = 72.52U_{c_{res}}^{0.87}$  | 0.0094 | 0.097                           | Very weak positive/no association |
| Independent sediment waves | $SWI = 30.88U_{c_{res}}^{-0.07}$ | 0.0051 | 0.071                           | Very weak negative/no association |
| Northern Banks             | $SWI = 33.3U_{c_{res}}^{-0.159}$ | 0.0099 | 0.099                           | Very weak negative/no association |
| Southern Banks             | $SWI = 66.03U_{c_{res}}^{0.026}$ | 0.0006 | 0.025                           | Very weak positive/no association |
| Full dataset               | $L = 123.61U_{c_{res}}^{-0.037}$ | 0.0028 | 0.053                           | Very weak negative/no association |
| Independent sediment waves | $L = 412.82U_{c_{res}}^{0.22}$   | 0.048  | 0.22                            | Weak positive                     |
| Northern Banks             | $L = 104.09U_{c_{res}}^{-0.072}$ | 0.0048 | 0.069                           | Very weak negative/no association |
| Southern Banks             | $L = 158.64U_{c_{res}}^{0.045}$  | 0.0031 | 0.056                           | Very weak positive/no association |
| Full dataset               | $H = 1.7U_{c_{res}}^{-0.12}$     | 0.013  | 0.114                           | Very weak negative/no association |
| Independent sediment waves | $H = 13.37U_{c_{res}}^{0.294}$   | 0.045  | 0.212                           | Weak positive                     |
| Northern Banks             | $H = 3.17U_{c_{res}}^{0.87}$     | 0.0021 | 0.046                           | Very weak positive/no association |
| Southern Banks             | $H = 2.4U_{c_{res}}^{0.02}$      | 0.0003 | 0.016                           | Very weak positive/no association |

**Table S8.** Relationship between sediment wave heights ( $H$ ), wavelengths ( $L$ ), and Sand Wave Index (SWI) with mean current speed ( $U_{c_{mean}}$ ) in the south-western Irish Sea.

| Dataset                    | Power Regression Equation        | $r^2$   | Correlation coefficient ( $r$ ) | Correlation description           |
|----------------------------|----------------------------------|---------|---------------------------------|-----------------------------------|
| Independent sediment waves | $SWI = 45.28U_{c_{mean}}^{0.2}$  | 0.0043  | 0.065                           | Very weak positive/no association |
| Northern Banks             | $SWI = 94.14U_{c_{mean}}^{0.97}$ | 0.011   | 0.105                           | Very weak positive/no association |
| Southern Banks             | $SWI = 69.48U_{c_{mean}}^{0.22}$ | 0.0034  | 0.058                           | Very weak positive/no association |
| Independent sediment waves | $L = 134.67U_{c_{mean}}^{-0.43}$ | 0.018   | 0.135                           | Very weak negative/no association |
| Northern Banks             | $L = 168.92U_{c_{mean}}^{0.46}$  | 0.006   | 0.077                           | Very weak positive/no association |
| Southern Banks             | $L = 129.61U_{c_{mean}}^{-0.09}$ | 0.00093 | 0.031                           | Very weak negative/no association |
| Independent sediment waves | $H = 2.97U_{c_{mean}}^{-0.63}$   | 0.021   | 0.15                            | Very weak negative/no association |
| Northern Banks             | $H = 1.79U_{c_{mean}}^{-0.51}$   | 0.0022  | 0.047                           | Very weak negative/no association |
| Southern Banks             | $H = 1.87U_{c_{mean}}^{-0.31}$   | 0.0051  | 0.071                           | Very weak negative/no association |

## References

1. M. Di Stefano and L. A. Mayer, "An automatic procedure for the quantitative characterization of submarine bedforms," *Geosciences*, vol. 8, no. 1, pp. 1–26, 2018, doi: 10.3390/geosciences8010028.
2. J. Jasiewicz and T. F. Stepinski, "Geomorphons-a pattern recognition approach to classification and mapping of landforms," *Geomorphology*, vol. 182, pp. 147–156, 2013, doi: 10.1016/j.geomorph.2012.11.005.
3. D. Dove *et al.*, "Seabed Geomorphology: a two-part classification system. Marine Geoscience Programme. Open Report OR/16/001," British Geological Survey, 2016.
4. K. J. J. Van Landeghem, A. J. Wheeler, N. C. Mitchell, and G. Sutton, "Variations in sediment wave dimensions across the tidally dominated Irish Sea, NW Europe," *Marine Geology*, vol. 263, no. 1–4, pp. 108–119, 2009, doi: 10.1016/j.mar-geo.2009.04.003.
5. J. D. Evans, *Straightforward statistics for the behavioral sciences*. Pacific Grove, CA: Brooks/Cole Publishing, 1996.
